# Supplementary material
Source: HighWire-hosted journal article supplement (https://hw-f5-jim.highwire.org/content/65/4/759)
Supplement: inline-supplementary-material-1 [file inline-supplementary-material-1.pdf]

## Supplemental Tables

**Supplemental Table 1.** Clinical features

| <b>Variable</b>                 | <b>No NG Group<br/>(n=140)</b> | <b>NG Group<br/>(n=140)</b> | <b>p value</b> |
|---------------------------------|--------------------------------|-----------------------------|----------------|
| <b>Past Medical<br/>History</b> |                                |                             |                |
| Diabetes Mellitus               | 35 (25%)                       | 30 (21.4%)                  | 0.479          |
| Hypertension                    | 58 (41%)                       | 55 (39%)                    | 0.715          |
| Chronic Kidney<br>Disease       | 17 (12%)                       | 11 (8%)                     | 0.232          |
| Cirrhosis                       | 42 (30%)                       | 42 (30%)                    | 1              |

|                                    |          |          |        |
|------------------------------------|----------|----------|--------|
| Atrial Fibrillation                | 2 (1%)   | 2 (1%)   | 1      |
| Neoplasia                          | 13 (9%)  | 9 (6%)   | 0.374  |
| Peptic Ulcer<br>Disease            | 13 (9%)  | 25 (18%) | 0.036* |
| Myocardial<br>Infarction           | 4 (3%)   | 4 (3%)   | 1      |
| Coronary Artery<br>Disease         | 13 (9%)  | 14 (10%) | 0.84   |
| Gastroesophageal<br>Reflux Disease | 24 (17%) | 10 (7%)  | 0.01*  |
| Congestive Heart<br>Failure        | 10 (7%)  | 11 (8%)  | 0.821  |
| Stroke                             | 5 (4%)   | 6 (4%)   | 0.758  |

|                                  |          |          |       |
|----------------------------------|----------|----------|-------|
| Gastric Bypass                   | 1 (1%)   | 4 (3%)   | 0.371 |
| Chronic Obstructive Lung Disease | 5 (4%)   | 4 (3%)   | 1     |
| <b>Social Habits</b>             |          |          |       |
| Tobacco                          | 60 (43%) | 56 (40%) | 0.628 |
| Alcohol                          | 68 (49%) | 71 (51%) | 0.72  |
| <b>Medications</b>               |          |          |       |
| Aspirin                          | 24 (17%) | 22 (16%) | 0.747 |
| NSAIDs                           | 24 (17%) | 34 (24%) | 0.14  |
| Clopidogrel                      | 7 (5%)   | 3 (2%)   | 0.198 |
| Coumadin                         | 6 (4%)   | 2 (1%)   | 0.282 |

|                             |          |          |       |
|-----------------------------|----------|----------|-------|
| Heparin                     | 7 (5%)   | 5 (4%)   | 0.555 |
| H2 blockers                 | 11 (8%)  | 11 (8%)  | 1     |
| Proton Pump Inhibitor       | 89 (64%) | 85 (61%) | 0.622 |
| Beta blockers               | 30 (21%) | 31 (22%) | 0.885 |
| Steroids                    | 3 (2%)   | 4 (3%)   | 1     |
| <b>Nasogastric aspirate</b> |          |          |       |
| Clear                       | na       | 79 (56%) |       |
| Coffee grounds              | na       | 20 (14%) |       |
| Bloody                      | na       | 30 (21%) |       |
| Unable to do                | na       | 11 (8%)  |       |

|                                  |    |          |  |
|----------------------------------|----|----------|--|
| <b>Complications<br/>from NG</b> |    |          |  |
| None                             | na | 93 (66%) |  |
| Pain                             | na | 29 (21%) |  |
| Bleeding                         | na | 7 (5%)   |  |
| Unable to place                  | na | 11 (8%)  |  |

**Supplemental Table 2.** Endoscopic therapy

|                            | <b>No NG</b> | <b>NG</b> |
|----------------------------|--------------|-----------|
| Banding (all varices)      | 20 (14%)     | 20 (14%)  |
| Epinephrine + heater probe | 11 (8%)      | 12 (9%)   |
| Epinephrine + endoclip     | 7 (5%)       | 9 (6%)    |
| Endoclip                   | 4 (3%)       | 4 (3%)    |
| *Other                     | 2 (1%)       | 3 (2%)    |
| None                       | 96 (69%)     | 92 (66%)  |

\*Heater probe, argon plasma coagulation, or epinephrine
